# Supplementary material for: Analysis of Knowledge, Attitudes and Behaviours of Health Care Workers towards Vaccine-Preventable Diseases and Recommended Vaccinations: An Observational Study in a Teaching Hospital
Source: MDPI journal article supplement (doi:10.3390/vaccines11010196), 2023-01-16
Supplement: s1 [file s1]

Table S1. Results univariate analysis – percentages positive answers – Measles.

| VARIABLE | GENDER |       | AGE  |        |       |       | OCCUPATION |        |      |      | MARITAL STATUS (married) |       | EMPLOYER |       | CARE UNIT |       |      |      | YEARS OF SERVICE |        |      |      | YEARS OF SERVICE C.U. |        |      |      | CHILDREN |        |      |      |
|----------|--------|-------|------|--------|-------|-------|------------|--------|------|------|--------------------------|-------|----------|-------|-----------|-------|------|------|------------------|--------|------|------|-----------------------|--------|------|------|----------|--------|------|------|
|          | (%)    | F     | M    | 20-29  | 30-39 | 40-49 | >50        | Phy    | Nur  | Resi | Other                    | No    | Yes      | Pub   | Priv      | Gen.  | I.D. | Neon | Card.            | Ped    | >20  | 0-5  | 11-20                 | 6-10   | >20  | 0-5  | 11-20    | 6-10   | Yes  | No   |
| 10_yes   |        | 57.7  | 52.6 | 75     | 62.1  | 47.2  | 38.1       | 61.7   | 53.6 | 73.6 | 31                       | 57.6  | 54.2     | 57    | 50        | 68.8  | 45.3 | 47.3 | 61.5             | 60     | 37.8 | 65.6 | 54.5                  | 68.4   | 28.2 | 61.8 | 52.3     | 61.5   | 50   | 60.7 |
| P        |        | 0.698 |      | <0.001 |       |       |            | 0.14   |      |      |                          | 0.18  |          | 0.709 |           | 0.052 |      |      |                  | 0.001  |      |      |                       | 0.007  |      |      |          | 0.101  |      |      |
| 12_agree |        | 16.9  | 24.2 | 17.1   | 12.6  | 24.5  | 25         | 6.4    | 22.3 | 11.3 | 34.5                     | 17.5  | 21.4     | 18.1  | 26.3      | 21.5  | 21.3 | 10.8 | 26.9             | 20     | 25.3 | 15.6 | 18.2                  | 18.4   | 17.9 | 16.6 | 27.3     | 26.9   | 19.2 | 19.1 |
| P        |        | 0.284 |      | 0.373  |       |       |            | 0.002  |      |      |                          | 0.212 |          | 0.03  |           | 0.198 |      |      |                  | 0.032  |      |      |                       | 0.44   |      |      |          | 0.105  |      |      |
| 13_agree |        | 85.9  | 76.8 | 88.2   | 84.2  | 77.4  | 83.3       | 97.9   | 78.8 | 96.2 | 69                       | 84.7  | 82.4     | 84.8  | 76.3      | 80.6  | 81.3 | 85.1 | 80.8             | 95     | 81.6 | 85.2 | 87.3                  | 78.9   | 87.2 | 83.9 | 84.1     | 76.9   | 82.3 | 84.8 |
| p        |        | 0.052 |      | 0.578  |       |       |            | <0.001 |      |      |                          | 0.861 |          | 0.275 |           | 0.404 |      |      |                  | 0.141  |      |      |                       | 0.785  |      |      |          | 0.681  |      |      |
| 14_agree |        | 50.7  | 47.4 | 52.6   | 57.9  | 39.6  | 44         | 44.7   | 52.5 | 47.2 | 44.8                     | 48.6  | 51.1     | 49.6  | 50        | 52.7  | 45.3 | 52.7 | 50               | 45     | 44.8 | 48.4 | 54.5                  | 57.9   | 46.2 | 52.3 | 45.5     | 42.3   | 46.2 | 52.2 |
| p        |        | 0.764 |      | 0.308  |       |       |            | 0.866  |      |      |                          | 0.371 |          | 0.244 |           | 0.935 |      |      |                  | 0.76   |      |      |                       | 0.741  |      |      |          | 0.568  |      |      |
| 15_agree |        | 79.3  | 72.6 | 88.2   | 78.9  | 62.3  | 75         | 83     | 76   | 86.8 | 58.6                     | 78    | 76.3     | 77    | 78.9      | 75.3  | 74.7 | 79.7 | 61.5             | 92.5   | 70.1 | 84.4 | 76.4                  | 71.1   | 69.2 | 79.4 | 77.3     | 73.1   | 73.8 | 79.8 |
| p        |        | 0.252 |      | <0.001 |       |       |            | 0.033  |      |      |                          | 0.726 |          | 0.742 |           | 0.063 |      |      |                  | <0.001 |      |      |                       | 0.001  |      |      |          | 0.007  |      |      |
| 16_agree |        | 94.8  | 97.9 | 100    | 95.8  | 96.2  | 91.7       | 97.9   | 95.2 | 100  | 86.2                     | 96    | 95.4     | 96.3  | 92.1      | 95.7  | 96   | 95.9 | 92.3             | 97.5   | 96.6 | 98.4 | 89.1                  | 94.7   | 94.9 | 97.5 | 93.2     | 88.5   | 95.4 | 96.1 |
| p        |        | 0.377 |      | 0.222  |       |       |            | 0.024  |      |      |                          | 0.846 |          | 0.186 |           | 0.442 |      |      |                  | 0.052  |      |      |                       | 0.019  |      |      |          | 0.684  |      |      |
| 17_agree |        | 70.4  | 80   | 86.8   | 73.7  | 79.2  | 57.1       | 83     | 67.6 | 86.8 | 69                       | 72.9  | 97       | 72.6  | 78.9      | 79.6  | 65.3 | 70.3 | 61.5             | 87.5   | 59.8 | 82.8 | 69.1                  | 78.9   | 53.8 | 78.9 | 65.9     | 73.1   | 66.2 | 78.7 |
| p        |        | 0.191 |      | <0.001 |       |       |            | 0.013  |      |      |                          | 0.963 |          | 0.007 |           | 0.107 |      |      |                  | 0.006  |      |      |                       | 0.033  |      |      |          | 0.025  |      |      |
| 18_agree |        | 92    | 86.3 | 97.4   | 93.7  | 84.9  | 83.3       | 95.7   | 87.7 | 100  | 79.3                     | 91.5  | 88.5     | 90.4  | 89.5      | 89.2  | 82.7 | 97.3 | 80.8             | 100    | 81.6 | 95.3 | 89.1                  | 94.7   | 79.5 | 92.5 | 86.4     | 96.2   | 86.2 | 93.3 |
| p        |        | 0.284 |      | 0.014  |       |       |            | 0.014  |      |      |                          | 0.639 |          | 0.36  |           | 0.005 |      |      |                  | 0.023  |      |      |                       | 0.024  |      |      |          | 0.013  |      |      |
| 19_agree |        | 92.5  | 96.8 | 98.7   | 94.7  | 98.1  | 85.7       | 93.6   | 92.7 | 100  | 98.7                     | 93.2  | 94.7     | 93.7  | 94.7      | 92.5  | 92   | 97.3 | 84.6             | 100    | 89.7 | 95.3 | 96.4                  | 94.7   | 87.2 | 95   | 93.2     | 96.2   | 93.1 | 94.4 |
| p        |        | 0.332 |      | 0.02   |       |       |            | 0.185  |      |      |                          | 0.862 |          | 0.685 |           | 0.062 |      |      |                  | 0.508  |      |      |                       | 0.404  |      |      |          | 0.717  |      |      |
| 20_agree |        | 77.9  | 73.7 | 86.8   | 77.9  | 77.4  | 65.5       | 78.7   | 76   | 79.2 | 72.4                     | 76.8  | 76.3     | 75.2  | 86.8      | 78.5  | 72   | 79.7 | 61.5             | 85     | 69   | 82.8 | 72.7                  | 78.9   | 71.8 | 79.9 | 75       | 61.5   | 76.9 | 76.4 |
| p        |        | 0.201 |      | 0.059  |       |       |            | 0.138  |      |      |                          | 0.766 |          | 0.099 |           | 0.241 |      |      |                  | 0.34   |      |      |                       | 0.382  |      |      |          | 0.994  |      |      |
| 21_yes   |        | 16.9  | 21.1 | 36.8   | 22.1  | 9.4   | 2.4        | 8.5    | 15.6 | 37.7 | 13.8                     | 22    | 13       | 17.8  | 21.1      | 28    | 18.7 | 10.8 | 0                | 20     | 4.6  | 28.9 | 1.8                   | 36.8   | 7.7  | 23.6 | 4.5      | 15.4   | 7.7  | 25.8 |
| p        |        | 0.471 |      | <0.001 |       |       |            | 0.002  |      |      |                          | 0.034 |          | 0.517 |           | 0.002 |      |      |                  | <0.001 |      |      |                       | 0.001  |      |      |          | <0.001 |      |      |
| 25_yes   |        | 53.5  | 54.7 | 19.7   | 45.3  | 77.4  | 79.8       | 72.3   | 58.1 | 22.6 | 55.2                     | 47.5  | 62.6     | 54.8  | 47.4      | 49.5  | 61.3 | 59.5 | 57.7             | 37.5   | 83.9 | 34.4 | 58.2                  | 44.7   | 82.1 | 79.5 | 69.2     | 53.9   | 66.9 | 44.4 |
| p        |        | 0.135 |      | <0.001 |       |       |            | <0.001 |      |      |                          | 0.021 |          | 0.328 |           | 0.202 |      |      |                  | <0.001 |      |      |                       | <0.001 |      |      |          | <0.001 |      |      |
| 26_agree |        | 83.6  | 81.1 | 93.4   | 89.5  | 77.4  | 69         | 85.1   | 79.3 | 94.3 | 79.3                     | 83.6  | 81.7     | 82.2  | 86.8      | 84.9  | 81.3 | 87.8 | 57.7             | 87.5   | 67.8 | 89.8 | 83.6                  | 92.1   | 74.4 | 87.4 | 75       | 73.1   | 77.7 | 86.5 |
| p        |        | 0.565 |      | <0.001 |       |       |            | 0.252  |      |      |                          | 0.763 |          | 0.573 |           | 0.043 |      |      |                  | <0.001 |      |      |                       | 0.012  |      |      |          | 0.108  |      |      |

Table S2. Results univariate analysis – percentages positive answers – Mumps.

| VARIABLE | GENDER |       | AGE  |       |        |       | OCCUPATION |      |        |      | MARITAL STATUS (married) |       | EMPLOYER |       | CARE UNIT |      |      |       | YEARS OF SERVICE |      |      |        | YEARS OF SERVICE C.U. |      |      |       | CHILDREN |      |        |      |
|----------|--------|-------|------|-------|--------|-------|------------|------|--------|------|--------------------------|-------|----------|-------|-----------|------|------|-------|------------------|------|------|--------|-----------------------|------|------|-------|----------|------|--------|------|
|          | (%)    | F     | M    | 20-29 | 30-39  | 40-49 | >50        | Phy  | Nur    | Resi | Other                    | No    | Yes      | Pub   | Priv      | Gen  | I.D. | Neon  | Card             | Ped  | >20  | 0-5    | 11-20                 | 6-10 | >20  | 0-5   | 11-20    | 6-10 | Yes    | No   |
| 10_yes   |        | 51.6  | 38.9 | 69.7  | 47.4   | 43.4  | 31         | 46.8 | 43     | 75.5 | 27.6                     | 49.7  | 45       | 48.5  | 42.1      | 53.8 | 37.3 | 47.3  | 57.7             | 47.5 | 31   | 59.4   | 45.5                  | 50   | 20.5 | 53.8  | 40.9     | 53.8 | 40     | 53.4 |
| p        |        | 0.101 |      |       | <0.001 |       |            |      | <0.001 |      |                          | 0.083 |          | 0.758 |           |      |      | 0.409 |                  |      |      | 0.003  |                       |      |      | 0.015 |          |      | 0.035  |      |
| 12_agree |        | 17.8  | 20   | 18.4  | 13.7   | 22.6  | 21.4       | 10.6 | 22.3   | 13.2 | 17.2                     | 15.3  | 22.9     | 19.3  | 13.2      | 22.6 | 21.3 | 13.5  | 15.4             | 15   | 21.8 | 14.1   | 20                    | 23.7 | 12.8 | 17.1  | 27.3     | 23.1 | 18.5   | 18.5 |
| p        |        | 0.06  |      |       | 0.761  |       |            |      | 0.004  |      |                          | 0.197 |          | 0.155 |           |      |      | 0.124 |                  |      |      | 0.12   |                       |      |      | 0.335 |          |      | 0.719  |      |
| 13_agree |        | 86.4  | 74.7 | 85.5  | 82.1   | 84.9  | 79.8       | 93.6 | 78.2   | 96.2 | 69                       | 84.2  | 80.9     | 83.7  | 76.3      | 78.5 | 80   | 85.1  | 80.8             | 95   | 81.6 | 82.8   | 89.1                  | 76.3 | 84.6 | 83.4  | 81.8     | 76.9 | 80.8   | 84.3 |
| p        |        | 0.039 |      |       | 0.97   |       |            |      | 0.001  |      |                          | 0.474 |          | 0.22  |           |      |      | 0.114 |                  |      |      | 0.479  |                       |      |      | 0.922 |          |      | 0.565  |      |
| 14_agree |        | 45.2  | 46.3 | 42.1  | 53.7   | 43.4  | 40.5       | 44.7 | 47.5   | 41.5 | 41.4                     | 42.9  | 48.9     | 45.6  | 44.7      | 43   | 44   | 48.6  | 50               | 45   | 43.7 | 41.4   | 52.7                  | 52.6 | 41   | 47.2  | 43.2     | 42.3 | 44.6   | 46.1 |
| p        |        | 0.964 |      |       | 0.464  |       |            |      | 0.952  |      |                          | 0.217 |          | 0.207 |           |      |      | 0.875 |                  |      |      | 0.565  |                       |      |      | 0.855 |          |      | 0.965  |      |
| 15_agree |        | 66.7  | 60   | 76.3  | 63.2   | 52.8  | 63.1       | 66   | 63.1   | 77.4 | 48.3                     | 62.1  | 67.1     | 63.7  | 71.1      | 52.7 | 64   | 71.6  | 57.7             | 85   | 58.6 | 70.3   | 63.6                  | 60.5 | 53.8 | 67.3  | 63.6     | 61.5 | 63.8   | 65.2 |
| p        |        | 0.446 |      |       | <0.001 |       |            |      | 0.121  |      |                          | 0.304 |          | 0.399 |           |      |      | 0.008 |                  |      |      | <0.001 |                       |      |      | 0.001 |          |      | 0.003  |      |
| 16_agree |        | 94.4  | 94.7 | 98.7  | 94.7   | 98.1  | 88.1       | 93.6 | 95     | 98.1 | 86.2                     | 96    | 92.4     | 94.8  | 92.1      | 93.5 | 93.3 | 95.9  | 92.3             | 97.5 | 94.3 | 96.9   | 89.1                  | 94.7 | 89.7 | 96.5  | 93.2     | 88.5 | 93.8   | 94.9 |
| p        |        | 0.59  |      |       | 0.073  |       |            |      | 0.139  |      |                          | 0.285 |          | 0.372 |           |      |      | 0.294 |                  |      |      | 0.404  |                       |      |      | 0.084 |          |      | 0.908  |      |
| 17_agree |        | 68.5  | 82.1 | 86.8  | 72.6   | 75.5  | 58.3       | 80.9 | 67.6   | 83   | 72.4                     | 71.8  | 74       | 71.9  | 78.9      | 78.5 | 69.3 | 66.2  | 57.7             | 87.5 | 59.8 | 82     | 67.3                  | 78.9 | 56.4 | 78.4  | 61.4     | 73.1 | 65.4   | 78.1 |
| p        |        | 0.041 |      |       | 0.003  |       |            |      | 0.19   |      |                          | 0.536 |          | 0.108 |           |      |      | 0.006 |                  |      |      | 0.002  |                       |      |      | 0.043 |          |      | 0.005  |      |
| 18_agree |        | 90.1  | 87.4 | 96.1  | 92.6   | 83    | 83.3       | 97.9 | 84.9   | 100  | 82.8                     | 89.8  | 88.5     | 88.9  | 92.1      | 88.2 | 80   | 97.3  | 80.8             | 100  | 80.5 | 94.5   | 90.9                  | 89.5 | 82.1 | 92.5  | 79.5     | 92.3 | 86.2   | 91.6 |
| p        |        | 0.761 |      |       | 0.016  |       |            |      | 0.005  |      |                          | 0.92  |          | 0.219 |           |      |      | 0.001 |                  |      |      | 0.008  |                       |      |      | 0.004 |          |      | 0.05   |      |
| 19_agree |        | 92    | 94.7 | 98.7  | 92.6   | 98.1  | 84.5       | 87.2 | 92.7   | 100  | 89.7                     | 92.7  | 93.1     | 92.6  | 94.7      | 90.3 | 92   | 97.3  | 80.8             | 100  | 88.5 | 93.8   | 96.4                  | 94.7 | 87.2 | 93.5  | 93.2     | 96.2 | 91.5   | 93.8 |
| p        |        | 0.262 |      |       | 0.017  |       |            |      | 0.169  |      |                          | 0.979 |          | 0.602 |           |      |      | 0.076 |                  |      |      | 0.518  |                       |      |      | 0.603 |          |      | 0.669  |      |
| 20_agree |        | 76.5  | 71.6 | 88.2  | 78.9   | 73.6  | 59.5       | 70.2 | 75.4   | 79.2 | 72.4                     | 75.7  | 74       | 73.3  | 86.8      | 79.6 | 68   | 75.7  | 65.1             | 85   | 63.2 | 84.4   | 69.1                  | 78.9 | 61.5 | 80.9  | 68.2     | 61.5 | 74.6   | 75.3 |
| p        |        | 0.174 |      |       | 0.002  |       |            |      | 0.105  |      |                          | 0.921 |          | 0.047 |           |      |      | 0.181 |                  |      |      | 0.26   |                       |      |      | 0.062 |          |      | 0.908  |      |
| 21_yes   |        | 16.4  | 21.1 | 38.2  | 21.1   | 7.5   | 2.4        | 8.5  | 15.6   | 37.7 | 10.3                     | 22.6  | 11.5     | 17.8  | 18.4      | 28   | 18.7 | 10.8  | 0                | 17.5 | 4.6  | 28.9   | 1.8                   | 34.2 | 7.7  | 23.1  | 4.5      | 15.4 | 7.7    | 25.3 |
| p        |        | 0.303 |      |       | <0.001 |       |            |      | 0.001  |      |                          | 0.26  |          | 0.293 |           |      |      | 0.002 |                  |      |      | <0.001 |                       |      |      | 0.001 |          |      | <0.001 |      |
| 25_yes   |        | 39.9  | 38   | 18.4  | 31.6   | 52.8  | 59.5       | 46.8 | 42.5   | 18.9 | 48.3                     | 36.7  | 43.5     | 40    | 36.8      | 35.5 | 42.7 | 43.2  | 46.2             | 32.5 | 60.9 | 25.8   | 54.5                  | 15.8 | 53.8 | 31.7  | 61.4     | 42.3 | 50     | 32   |
| p        |        | 0.058 |      |       | <0.001 |       |            |      | 0.012  |      |                          | 0.434 |          | 0.922 |           |      |      | 0.4   |                  |      |      | <0.001 |                       |      |      | 0.006 |          |      | 0.004  |      |
| 26_agree |        | 81.7  | 81.1 | 94.7  | 87.4   | 75.4  | 66.7       | 80.9 | 78.2   | 94.3 | 79.3                     | 83.1  | 79.4     | 80.7  | 86.8      | 82.8 | 80   | 86.5  | 57.7             | 87.5 | 65.5 | 89.8   | 80                    | 92.1 | 71.8 | 86.9  | 70.5     | 73.1 | 75.4   | 86   |
| p        |        | 0.693 |      |       | <0.001 |       |            |      | 0.181  |      |                          | 0.711 |          | 0.582 |           |      |      | 0.057 |                  |      |      | <0.001 |                       |      |      | 0.006 |          |      | 0.032  |      |

| Table S3. Results univariate analysis – percentages positive answers – Rubella. |        |      |        |       |       |      |            |      |      |       |                          |      |          |      |           |      |      |      |                  |      |      |       |                       |      |      |       |          |      |      |
|---------------------------------------------------------------------------------|--------|------|--------|-------|-------|------|------------|------|------|-------|--------------------------|------|----------|------|-----------|------|------|------|------------------|------|------|-------|-----------------------|------|------|-------|----------|------|------|
| VARIABLE                                                                        | GENDER |      | AGE    |       |       |      | OCCUPATION |      |      |       | MARITAL STATUS (married) |      | EMPLOYER |      | CARE UNIT |      |      |      | YEARS OF SERVICE |      |      |       | YEARS OF SERVICE C.U. |      |      |       | CHILDREN |      |      |
| (N%)                                                                            | F      | M    | 20-29  | 30-39 | 40-49 | >50  | Phy        | Nur  | Resi | Other | No                       | Yes  | Pub      | Priv | Gen       | I.D. | Neon | Card | Ped              | >20  | 0-5  | 11-20 | 6-10                  | >20  | 0-5  | 11-20 | 6-10     | Yes  | No   |
| 10_yes                                                                          | 54.5   | 45.3 | 72.4   | 52.6  | 45.3  | 35.7 | 57.4       | 46.4 | 75.5 | 31    | 53.1                     | 49.6 | 52.2     | 57.4 | 61.3      | 41.3 | 47.3 | 61.5 | 50               | 35.6 | 64.1 | 49.1  | 50                    | 25.6 | 57.3 | 47.7  | 53.8     | 44.6 | 56.7 |
| p                                                                               | 0.241  |      | <0.001 |       |       |      | 0.002      |      |      |       | 0.006                    |      | 0.826    |      | 0.258     |      |      |      | 0.002            |      |      |       | 0.027                 |      |      |       | 0.001    |      |      |
| 12_agree                                                                        | 14.6   | 24.2 | 18.4   | 9.5   | 22.6  | 22.6 | 8.5        | 21.2 | 7.5  | 27.6  | 14.7                     | 21.4 | 17       | 21   | 17.2      | 21.3 | 10.8 | 19.2 | 22.5             | 21.8 | 14.1 | 16.4  | 21.1                  | 12.8 | 15.6 | 25    | 26.9     | 17.7 | 17.4 |
| p                                                                               | 0.116  |      | 0.081  |       |       |      | 0.01       |      |      |       | 0.307                    |      | 0.397    |      | 0.074     |      |      |      | 0.151            |      |      |       | 0.509                 |      |      |       | 0.714    |      |      |
| 13_agree                                                                        | 85.9   | 75.8 | 85.5   | 82.1  | 83    | 81   | 93.6       | 78.2 | 96.2 | 69    | 83.1                     | 82.4 | 83.7     | 76.3 | 78.5      | 81.3 | 83.8 | 80.8 | 95               | 81.6 | 83.6 | 87.3  | 76.3                  | 84.6 | 83.4 | 84.1  | 73.1     | 81.5 | 83.7 |
| p                                                                               | 0.083  |      | 0.95   |       |       |      | <0.001     |      |      |       | 0.807                    |      | 0.18     |      | 0.395     |      |      |      | 0.224            |      |      |       | 0.873                 |      |      |       | 0.674    |      |      |
| 14_agree                                                                        | 46.9   | 49.5 | 47.4   | 55.8  | 43.4  | 41.7 | 44.7       | 50.8 | 43.4 | 41.4  | 46.3                     | 49.6 | 47.8     | 47.4 | 48.4      | 46.7 | 48.6 | 50   | 45               | 44.8 | 44.5 | 52.7  | 57.9                  | 41   | 50.4 | 43.2  | 42.3     | 46.2 | 48.9 |
| p                                                                               | 0.873  |      | 0.423  |       |       |      | 0.774      |      |      |       | 0.279                    |      | 0.187    |      | 0.993     |      |      |      | 0.45             |      |      |       | 0.555                 |      |      |       | 0.893    |      |      |
| 15_agree                                                                        | 71.4   | 64.2 | 78.9   | 66.3  | 60.4  | 69   | 72.3       | 67.6 | 81.1 | 51.7  | 67.8                     | 71   | 78.9     | 71.1 | 61.3      | 70.7 | 70.3 | 61.5 | 87.5             | 66.7 | 73.4 | 67.3  | 63.2                  | 61.5 | 70.9 | 68.2  | 69.2     | 70   | 68.5 |
| p                                                                               | 0.308  |      | <0.001 |       |       |      | 0.12       |      |      |       | 0.5                      |      | 0.607    |      | 0.051     |      |      |      | <0.001           |      |      |       | <0.001                |      |      |       | 0.003    |      |      |
| 16_agree                                                                        | 95.3   | 96.8 | 100    | 96.8  | 96.2  | 90.5 | 97.9       | 96.1 | 98.1 | 86.2  | 96.6                     | 94.7 | 96.3     | 92.1 | 95.7      | 94.7 | 97.3 | 92.3 | 97.5             | 95.4 | 97.7 | 90.9  | 97.4                  | 92.3 | 97   | 95.5  | 92.3     | 95.4 | 96.1 |
| p                                                                               | 0.75   |      | 0.074  |       |       |      | 0.036      |      |      |       | 0.501                    |      | 0.186    |      | 0.71      |      |      |      | 0.129            |      |      |       | 0.536                 |      |      |       | 0.84     |      |      |
| 17_agree                                                                        | 70.4   | 76.8 | 89.5   | 75.8  | 73.6  | 52.4 | 76.6       | 68.2 | 84.9 | 69    | 72.9                     | 71.8 | 71.1     | 81.6 | 80.6      | 65.3 | 66.2 | 61.5 | 85               | 55.2 | 85.2 | 69.1  | 73.7                  | 46.2 | 80.4 | 61.4  | 69.2     | 64.6 | 78.1 |
| p                                                                               | 0.474  |      | <0.001 |       |       |      | 0.079      |      |      |       | 0.926                    |      | 0.009    |      | 0.053     |      |      |      | <0.001           |      |      |       | <0.001                |      |      |       | 0.011    |      |      |
| 18_agree                                                                        | 90.6   | 88.4 | 96.1   | 93.7  | 84.9  | 83.3 | 95.7       | 87.2 | 100  | 79.3  | 91.5                     | 87.8 | 90       | 89.5 | 88.2      | 84   | 95.9 | 80.8 | 100              | 82.8 | 94.5 | 89.1  | 92.1                  | 79.5 | 92.5 | 84.1  | 96.2     | 86.2 | 92.7 |
| p                                                                               | 0.375  |      | 0.051  |       |       |      | 0.011      |      |      |       | 0.488                    |      | 0.341    |      | 0.004     |      |      |      | 0.018            |      |      |       | 0.047                 |      |      |       | 0.029    |      |      |
| 19_agree                                                                        | 92.5   | 94.7 | 98.7   | 93.7  | 98.1  | 84.5 | 89.4       | 92.7 | 100  | 89.7  | 92.7                     | 93.9 | 93       | 94.7 | 91.4      | 92   | 97.3 | 80.8 | 100              | 88.5 | 94.5 | 96.4  | 94.7                  | 87.2 | 94   | 93.2  | 96.2     | 92.3 | 93.8 |
| p                                                                               | 0.315  |      | 0.011  |       |       |      | 0.225      |      |      |       | 0.87                     |      | 0.593    |      | 0.74      |      |      |      | 0.481            |      |      |       | 0.535                 |      |      |       | 0.719    |      |      |
| 20_agree                                                                        | 76.5   | 72.6 | 86.8   | 78.9  | 77.4  | 59.5 | 70.2       | 76   | 79.2 | 72.4  | 76.3                     | 74   | 73.7     | 86.8 | 79.6      | 68   | 77   | 61.5 | 85               | 64.4 | 83.6 | 70.9  | 78.9                  | 64.1 | 80.4 | 70.5  | 61.5     | 75.4 | 75.3 |
| p                                                                               | 0.317  |      | 0.004  |       |       |      | 0.114      |      |      |       | 0.876                    |      | 0.63     |      | 0.183     |      |      |      | 0.62             |      |      |       | 0.101                 |      |      |       | 0.995    |      |      |
| 21_yes                                                                          | 19.2   | 20   | 42.1   | 22.1  | 9.4   | 2.4  | 8.5        | 17.9 | 39.6 | 10.3  | 24.9                     | 12.2 | 18.9     | 23.7 | 28        | 20   | 12.2 | 3.8  | 22.5             | 5.7  | 31.3 | 3.6   | 34.2                  | 10.3 | 25.1 | 4.5   | 15.4     | 8.5  | 27.5 |
| p                                                                               | 0.416  |      | <0.001 |       |       |      | 0.001      |      |      |       | 0.011                    |      | 0.29     |      | 0.002     |      |      |      | <0.001           |      |      |       | <0.001                |      |      |       | <0.001   |      |      |
| 25_yes                                                                          | 44.6   | 36.8 | 18.4   | 30.5  | 62.3  | 64.3 | 51.1       | 44.7 | 26.4 | 41.4  | 33.9                     | 53.4 | 43.3     | 34.2 | 35.5      | 50.7 | 50   | 42.3 | 27.5             | 66.7 | 26.6 | 47.3  | 31.6                  | 64.1 | 32.7 | 61.4  | 50       | 54.6 | 33.1 |
| p                                                                               | 0.056  |      | <0.001 |       |       |      | 0.111      |      |      |       | 0.002                    |      | 0.453    |      | 0.169     |      |      |      | <0.001           |      |      |       | 0.001                 |      |      |       | <0.001   |      |      |
| 26_agree                                                                        | 84     | 84.2 | 94.7   | 90.5  | 81.1  | 69   | 85.1       | 81.6 | 94.3 | 79.3  | 84.7                     | 83.2 | 83.7     | 86.8 | 87.1      | 84   | 87.8 | 57.7 | 87.5             | 70.1 | 91.4 | 83.6  | 92.1                  | 74.4 | 89.4 | 75    | 73.1     | 77.7 | 88.8 |
| p                                                                               | 0.858  |      | <0.001 |       |       |      | 0.373      |      |      |       | 0.935                    |      | 0.618    |      | 0.032     |      |      |      | <0.001           |      |      |       | 0.003                 |      |      |       | 0.028    |      |      |

Table S4. Results univariate analysis – percentages positive answers – Chickenpox.

| VARIABLE | GENDER |       | AGE  |        |       |       | OCCUPATION |       |      |      | MARITAL STATUS (married) |       | EMPLOYER |       | CARE UNIT |       |      |      | YEARS OF SERVICE |        |      |      | YEARS OF SERVICE C.U. |       |      |      | CHILDREN |        |      |      |
|----------|--------|-------|------|--------|-------|-------|------------|-------|------|------|--------------------------|-------|----------|-------|-----------|-------|------|------|------------------|--------|------|------|-----------------------|-------|------|------|----------|--------|------|------|
|          | (N%)   | F     | M    | 20-29  | 30-39 | 40-49 | >50        | Phy   | Nur  | Resi | Other                    | No    | Yes      | Pub   | Priv      | Gen   | I.D. | Neon | Card             | Ped    | >20  | 0-5  | 11-20                 | 6-10  | >20  | 0-5  | 11-20    | 6-10   | Yes  | No   |
| 10_yes   |        | 55.9  | 43.2 | 72.4   | 55.8  | 47.2  | 32.1       | 46.8  | 49.7 | 75.5 | 31                       | 54.8  | 48.1     | 53    | 44.7      | 60.2  | 38.7 | 50   | 53.8             | 60     | 34.5 | 60.9 | 49.1                  | 65.8  | 23.1 | 57.3 | 45.5     | 65.4   | 43.1 | 58.4 |
| p        |        | 0.116 |      | <0.001 |       |       |            | 0.001 |      |      |                          | 0.001 |          | 0.592 |           | 0.085 |      |      |                  | 0.001  |      |      |                       | 0.003 |      |      |          | 0.009  |      |      |
| 12_agree |        | 11.7  | 24.5 | 11.8   | 9.5   | 24.5  | 20.2       | 10.6  | 17.3 | 5.7  | 31                       | 14.1  | 17.6     | 14.1  | 26.3      | 16.1  | 16   | 12.2 | 23.1             | 15     | 20.7 | 11.7 | 14.5                  | 18.4  | 12.8 | 13.6 | 20.5     | 26.9   | 17.7 | 14   |
| p        |        | 0.008 |      | 0.176  |       |       |            | 0.027 |      |      |                          | 0.117 |          | 0.146 |           | 0.063 |      |      |                  | 0.167  |      |      |                       | 0.574 |      |      |          | 0.118  |      |      |
| 13_agree |        | 85    | 77.9 | 85.5   | 85.3  | 73.6  | 83.3       | 89.4  | 79.3 | 94.3 | 72.4                     | 84.7  | 80.2     | 83.3  | 78.9      | 78.5  | 85.3 | 81.1 | 76.9             | 95     | 83.9 | 82.8 | 80                    | 84.2  | 89.7 | 82.8 | 79.5     | 76.9   | 77.7 | 86.6 |
| p        |        | 0.314 |      | 0.358  |       |       |            | 0.058 |      |      |                          | 0.566 |          | 0.723 |           | 0.289 |      |      |                  | 0.507  |      |      |                       | 0.747 |      |      |          | 0.122  |      |      |
| 14_agree |        | 48.4  | 51.6 | 51.6   | 56.8  | 41.5  | 42.9       | 42.6  | 53.6 | 43.4 | 44.8                     | 49.2  | 49.6     | 49.3  | 50        | 52.7  | 48   | 51.4 | 46.2             | 42.5   | 46   | 46.9 | 50.9                  | 63.2  | 43.6 | 52.3 | 43.2     | 46.2   | 45.4 | 52.2 |
| p        |        | .815  |      | 0.436  |       |       |            | 0.541 |      |      |                          | 0.384 |          | 0.188 |           | 0.911 |      |      |                  | 0.54   |      |      |                       | 0.703 |      |      |          | 0.464  |      |      |
| 15_agree |        | 80.8  | 74.7 | 89.5   | 80    | 71.7  | 72.6       | 80.9  | 79.3 | 86.4 | 58.6                     | 77.4  | 80.9     | 78.9  | 78.9      | 77.4  | 77.3 | 79.7 | 61.5             | 95     | 72.4 | 85.2 | 76.4                  | 76.3  | 64.1 | 81.4 | 79.5     | 80.8   | 75.4 | 81.5 |
| p        |        | 0.262 |      | 0.001  |       |       |            | 0.05  |      |      |                          | 0.577 |          | 0.872 |           | 0.029 |      |      |                  | 0.001  |      |      |                       | 0.002 |      |      |          | 0.045  |      |      |
| 16_agree |        | 90.1  | 94.7 | 93.4   | 95.8  | 88.7  | 87.9       | 95.7  | 90.5 | 96.2 | 82.8                     | 90.4  | 93.1     | 91.9  | 89.5      | 90.3  | 92   | 93.2 | 88.5             | 92.5   | 88.5 | 93   | 90.9                  | 94.7  | 89.7 | 94   | 88.6     | 80.8   | 91.5 | 91.6 |
| p        |        | 0.393 |      | 0.377  |       |       |            | 0.146 |      |      |                          | 0.365 |          | 0.568 |           | 0.716 |      |      |                  | 0.487  |      |      |                       | 0.042 |      |      |          | 0.748  |      |      |
| 17_agree |        | 76.8  |      | 90.8   | 72.6  | 71.7  | 54.8       | 78.7  | 66.5 | 86.8 | 69                       | 72.3  | 71.8     | 71.1  | 78.9      | 78.5  | 65.3 | 66.2 | 53.8             | 92.5   | 58.6 | 84.4 | 60                    | 78.9  | 51.3 | 78.4 | 61.4     | 73.1   | 60.8 | 80.3 |
| p        |        | 0.439 |      | <0.001 |       |       |            | 0.34  |      |      |                          | 0.931 |          | 0.002 |           | 0.009 |      |      |                  | <0.001 |      |      |                       | 0.006 |      |      |          | 0.001  |      |      |
| 18_agree |        | 91.1  | 86.3 | 97.4   | 91.6  | 84.9  | 83.3       | 95.7  | 86.6 | 100  | 79.3                     | 90.4  | 88.5     | 89.6  | 89.5      | 88.2  | 82.7 | 95.9 | 80.8             | 100    | 82.8 | 95.3 | 87.3                  | 89.5  | 79.5 | 92.5 | 84.1     | 92.3   | 85.4 | 92.7 |
| p        |        | 0.39  |      | 0.008  |       |       |            | 0.12  |      |      |                          | 0.462 |          | 0.399 |           | 0.005 |      |      |                  | 0.007  |      |      |                       | 0.006 |      |      |          | 0.029  |      |      |
| 19_agree |        | 91.5  | 96.8 | 98.7   | 93.7  | 98.1  | 84.5       | 89.4  | 92.7 | 100  | 89.7                     | 92.1  | 94.7     | 93    | 94.7      | 92.5  | 90.7 | 95.9 | 84.6             | 100    | 88.5 | 94.5 | 96.4                  | 94.7  | 87.4 | 94.5 | 90.9     | 96.2   | 93.1 | 93.3 |
| p        |        | 0.232 |      | 0.008  |       |       |            | 0.214 |      |      |                          | 0.677 |          | 0.647 |           | 0.045 |      |      |                  | 0.522  |      |      |                       | 0.634 |      |      |          | 0.914  |      |      |
| 20_agree |        | 77.5  | 77.9 | 86.8   | 78.9  | 81.1  | 65.5       | 76.6  | 78.2 | 79.2 | 72.4                     | 76.8  | 78.6     | 76.3  | 86.8      | 80.6  | 74.7 | 77   | 61.5             | 87.5   | 72.4 | 83.6 | 70.9                  | 78.9  | 69.2 | 81.4 | 75       | 65.4   | 77.7 | 77.5 |
| p        |        | 0.587 |      | 0.027  |       |       |            | 0.111 |      |      |                          | 0.898 |          | 0.096 |           | 0.214 |      |      |                  | 0.342  |      |      |                       | 0.33  |      |      |          | 0.999  |      |      |
| 21_yes   |        | 13.1  | 17.9 | 30.3   | 15.8  | 9.4   | 2.4        | 6.4   | 12.3 | 34   | 6.9                      | 17.5  | 10.7     | 14.8  | 13.2      | 24.7  | 14.7 | 8.1  | 3.8              | 10     | 4.6  | 23.4 | 1.8                   | 26.3  | 7.7  | 18.6 | 4.5      | 11.5   | 7.7  | 19.7 |
| p        |        | 0.549 |      | <0.001 |       |       |            | 0.001 |      |      |                          | 0.033 |          | 0.934 |           | 0.003 |      |      |                  | <0.001 |      |      |                       | 0.018 |      |      |          | <0.001 |      |      |
| 25_yes   |        | 81.2  | 75.8 | 78.9   | 80    | 83    | 77.4       | 87.2  | 77.1 | 81.1 | 79.3                     | 79.7  | 79.4     | 79.6  | 78.9      | 80.6  | 78.7 | 78.4 | 76.9             | 82.5   | 82.8 | 81.3 | 72.7                  | 76.3  | 82.1 | 79.4 | 79.5     | 76.9   | 76.9 | 81.5 |
| p        |        | 0.521 |      | 0.551  |       |       |            | 0.375 |      |      |                          | 0.942 |          | 0.715 |           | 0.714 |      |      |                  | 0.025  |      |      |                       | 0.986 |      |      |          | 0.545  |      |      |
| 26_agree |        | 82.2  | 81.1 | 90.8   | 86.3  | 81.1  | 69         | 85.1  | 77.7 | 94.3 | 79.3                     | 82.5  | 80.9     | 81.5  | 84.2      | 80.6  | 82.7 | 89.2 | 57.7             | 85     | 70.1 | 87.5 | 80                    | 92.1  | 76.9 | 85.9 | 72.7     | 73.1   | 76.2 | 86   |
| p        |        | 0.517 |      | 0.008  |       |       |            | 0.085 |      |      |                          | 0.648 |          | 0.712 |           | 0.134 |      |      |                  | 0.004  |      |      |                       | 0.083 |      |      |          | 0.059  |      |      |

| Table S5. Results univariate analysis – percentages positive answers – Pertussis. |        |      |        |       |       |      |            |      |      |       |                          |      |          |      |           |      |      |      |                  |      |      |       |                       |      |      |       |          |      |      |
|-----------------------------------------------------------------------------------|--------|------|--------|-------|-------|------|------------|------|------|-------|--------------------------|------|----------|------|-----------|------|------|------|------------------|------|------|-------|-----------------------|------|------|-------|----------|------|------|
| VARIABLE                                                                          | GENDER |      | AGE    |       |       |      | OCCUPATION |      |      |       | MARITAL STATUS (married) |      | EMPLOYER |      | CARE UNIT |      |      |      | YEARS OF SERVICE |      |      |       | YEARS OF SERVICE C.U. |      |      |       | CHILDREN |      |      |
| (N%)                                                                              | F      | M    | 20-29  | 30-39 | 40-49 | >50  | Phy        | Nur  | Resi | Other | No                       | Yes  | Publ     | Priv | Gen       | I.D. | Neo  | Card | Ped              | >20  | 0-5  | 11-20 | 6-10                  | >20  | 0-5  | 11-20 | 6-10     | Yes  | No   |
| 10_yes                                                                            | 51.2   | 43.2 | 68.4   | 52.6  | 43.4  | 29.8 | 48.9       | 43.6 | 77.4 | 27.6  | 50.3                     | 46.6 | 49.6     | 42.1 | 55.9      | 38.7 | 45.9 | 61.5 | 47.5             | 32.2 | 60.9 | 41.8  | 55.3                  | 20.5 | 55.8 | 38.6  | 53.8     | 40   | 55.1 |
| p                                                                                 | 0.415  |      | <0.001 |       |       |      | <0.001     |      |      |       | 0.055                    |      | 0.666    |      | 0.254     |      |      |      | 0.002            |      |      |       | 0.002                 |      |      |       | 0.01     |      |      |
| 12_agree                                                                          | 23.5   | 30.5 | 21.1   | 21.1  | 31.1  | 31   | 31.9       | 29.1 | 13.2 | 17.2  | 25.4                     | 26   | 26.3     | 21.1 | 26.9      | 24   | 20.3 | 30.8 | 32.5             | 32.2 | 19.5 | 27.3  | 28.9                  | 25.6 | 23.1 | 36.4  | 26.9     | 26.7 | 24.2 |
| P                                                                                 | 0.298  |      | 0.545  |       |       |      | 0.002      |      |      |       | 0.987                    |      | 0.202    |      | 0.2       |      |      |      | 0.031            |      |      |       | 0.109                 |      |      |       | 0.455    |      |      |
| 13_agree                                                                          | 85.4   | 74.7 | 86.8   | 82.1  | 83    | 77.4 | 95.7       | 76.5 | 96.2 | 69    | 82.9                     | 82.4 | 83       | 76.3 | 79.6      | 78.7 | 83.8 | 80.8 | 92.5             | 78.2 | 84.4 | 87.3  | 76.3                  | 81.1 | 83.9 | 77.3  | 76.9     | 80   | 83.7 |
| p                                                                                 | 0.071  |      | 0.779  |       |       |      | <0.001     |      |      |       | 0.886                    |      | 0.356    |      | 0.352     |      |      |      | 0.213            |      |      |       | 0.826                 |      |      |       | 0.652    |      |      |
| 14_agree                                                                          | 43.7   | 45.3 | 39.5   | 52.6  | 43.4  | 39.3 | 44.7       | 45.8 | 39.6 | 41.4  | 41.2                     | 48.1 | 44.1     | 44.7 | 41.9      | 45.3 | 45.9 | 50   | 40               | 42.5 | 39.8 | 50.9  | 52.6                  | 41   | 45.7 | 38.6  | 46.2     | 44.6 | 43.8 |
| p                                                                                 | 0.959  |      | 0.485  |       |       |      | 0.919      |      |      |       | 0.099                    |      | 0.178    |      | 0.939     |      |      |      | 0.408            |      |      |       | 0.734                 |      |      |       | 0.941    |      |      |
| 15_agree                                                                          | 68.5   | 66.3 | 75     | 68.4  | 60.4  | 65.5 | 74.5       | 64.8 | 81.1 | 51.7  | 66.1                     | 70.2 | 67.4     | 71.1 | 59.1      | 69.3 | 68.9 | 53.8 | 92.5             | 63.2 | 73.4 | 69.1  | 57.9                  | 56.4 | 70.9 | 70.5  | 57.7     | 67.2 | 69.1 |
| p                                                                                 | 0.718  |      | 0.006  |       |       |      | 0.134      |      |      |       | 0.591                    |      | 0.312    |      | 0.008     |      |      |      | <0.001           |      |      |       | 0.002                 |      |      |       | 0.018    |      |      |
| 16_agree                                                                          | 93     | 91.6 | 94.7   | 93.7  | 98.1  | 85.7 | 91.5       | 93.9 | 94.3 | 82.8  | 92.1                     | 93.1 | 93.3     | 86.8 | 89.2      | 93.3 | 95.9 | 92.3 | 92.5             | 92   | 93   | 90.9  | 94.7                  | 87.2 | 94   | 93.2  | 88.5     | 93.8 | 91.6 |
| p                                                                                 | 0.877  |      | 0.055  |       |       |      | 0.095      |      |      |       | 0.584                    |      | 0.09     |      | 0.717     |      |      |      | 0.742            |      |      |       | 0.617                 |      |      |       | 0.567    |      |      |
| 17_agree                                                                          | 69     | 78.9 | 86.8   | 69.5  | 75.5  | 59.5 | 89.4       | 64.8 | 81.1 | 72.4  | 69.5                     | 75.6 | 71.1     | 78.9 | 76.3      | 68   | 68.9 | 57.7 | 85               | 60.9 | 82   | 65.5  | 73.7                  | 61.5 | 77.9 | 59.1  | 65.4     | 65.4 | 77   |
| p                                                                                 | 0.168  |      | 0.014  |       |       |      | 0.022      |      |      |       | 0.486                    |      | 0.012    |      | 0.052     |      |      |      | 0.015            |      |      |       | 0.094                 |      |      |       | 0.028    |      |      |
| 18_agree                                                                          | 90.1   | 88.4 | 96.1   | 92.6  | 86.8  | 82.1 | 95.7       | 86.6 | 98.1 | 82.8  | 89.3                     | 90.1 | 89.3     | 92.1 | 87.1      | 82.7 | 97.3 | 80.8 | 100              | 81.6 | 94.5 | 89.1  | 92.1                  | 79.5 | 93   | 79.5  | 96.2     | 85.4 | 92.7 |
| p                                                                                 | 0.894  |      | 0.052  |       |       |      | 0.028      |      |      |       | 0.716                    |      | 0.198    |      | 0.001     |      |      |      | 0.008            |      |      |       | 0.005                 |      |      |       | 0.045    |      |      |
| 19_agree                                                                          | 92     | 95.8 | 98.7   | 94.7  | 98.1  | 83.3 | 89.4       | 92.7 | 100  | 89.7  | 92.7                     | 93.9 | 93       | 94.7 | 92.5      | 92   | 95.9 | 80.8 | 100              | 87.4 | 95.3 | 96.4  | 94.7                  | 84.6 | 94.5 | 93.2  | 96.2     | 92.3 | 93.8 |
| p                                                                                 | 0.384  |      | 0.004  |       |       |      | 0.225      |      |      |       | 0.87                     |      | 0.593    |      | 0.132     |      |      |      | 0.164            |      |      |       | 0.179                 |      |      |       | 0.719    |      |      |
| 20_agree                                                                          | 77     | 73.7 | 85.5   | 77.9  | 79.2  | 63.1 | 76.6       | 75.4 | 79.2 | 72.4  | 75.7                     | 76.3 | 74.4     | 86.8 | 76.3      | 70.7 | 79.7 | 61.5 | 87.5             | 70.1 | 82   | 69.1  | 78.9                  | 69.2 | 80.4 | 70.5  | 61.5     | 75.4 | 76.4 |
| p                                                                                 | 0.164  |      | 0.053  |       |       |      | 0.143      |      |      |       | 0.698                    |      | 0.076    |      | 0.209     |      |      |      | 0.343            |      |      |       | 0.295                 |      |      |       | 0.847    |      |      |
| 21_yes                                                                            | 15.5   | 18.9 | 35.5   | 20    | 5.7   | 2.4  | 14.9       | 11.2 | 41.5 | 6.9   | 18.6                     | 13.7 | 16.7     | 15.8 | 23.7      | 21.3 | 10.8 | 0    | 12.5             | 3.4  | 29.7 | 1.8   | 23.7                  | 5.1  | 22.6 | 4.5   | 7.7      | 9.2  | 21.9 |
| P                                                                                 | 0.695  |      | <0.001 |       |       |      | <0.001     |      |      |       | 0.028                    |      | 0.262    |      | 0.001     |      |      |      | <0.001           |      |      |       | <0.001                |      |      |       | <0.001   |      |      |
| 25_yes                                                                            | 24.4   | 16.8 | 5.3    | 22.1  | 34    | 29.8 | 27.7       | 20.1 | 13.2 | 41.4  | 22                       | 22.1 | 21.5     | 26.3 | 20.4      | 24   | 23   | 23.1 | 20               | 26.4 | 16.4 | 30.9  | 18.4                  | 25.6 | 19.1 | 27.3  | 30.8     | 28.5 | 17.4 |
| p                                                                                 | 0.009  |      | 0.001  |       |       |      | 0.03       |      |      |       | 0.396                    |      | 0.552    |      | 0.842     |      |      |      | 0.115            |      |      |       | 0.019                 |      |      |       | 0.076    |      |      |
| 26_agree                                                                          | 82.6   | 81.1 | 93.4   | 87.4  | 79.2  | 67.9 | 83         | 79.3 | 92.5 | 79.3  | 83.1                     | 80.9 | 81.5     | 86.8 | 81.7      | 86.7 | 81.5 | 57.7 | 85               | 77.8 | 89.8 | 80    | 92.1                  | 71.8 | 87.9 | 70.5  | 73.1     | 75.4 | 87.1 |
| p                                                                                 | 0.647  |      | 0.001  |       |       |      | 0.312      |      |      |       | 0.85                     |      | 0.542    |      | 0.037     |      |      |      | <0.001           |      |      |       | 0.014                 |      |      |       | 0.029    |      |      |

| Table S6. Results univariate analysis – percentages positive answers – Meningococcal disease. |        |      |        |       |       |      |            |      |      |       |                          |      |          |      |           |      |      |      |                  |      |      |       |                       |      |      |       |          |      |      |
|-----------------------------------------------------------------------------------------------|--------|------|--------|-------|-------|------|------------|------|------|-------|--------------------------|------|----------|------|-----------|------|------|------|------------------|------|------|-------|-----------------------|------|------|-------|----------|------|------|
| VARIABLE                                                                                      | GENDER |      | AGE    |       |       |      | OCCUPATION |      |      |       | MARITAL STATUS (married) |      | EMPLOYER |      | CARE UNIT |      |      |      | YEARS OF SERVICE |      |      |       | YEARS OF SERVICE C.U. |      |      |       | CHILDREN |      |      |
| (N%)                                                                                          | F      | M    | 20-29  | 30-39 | 40-49 | >50  | Phy        | Nur  | Resi | Other | No                       | Yes  | Pub      | Priv | Gen       | I.D. | Neon | Card | Ped              | >20  | 0-5  | 11-20 | 6-10                  | >20  | 0-5  | 11-20 | 6-10     | Yes  | No   |
| 10_yes                                                                                        | 60.6   | 48.4 | 67.1   | 64.2  | 47.2  | 45.2 | 66         | 55.9 | 66   | 31    | 57.6                     | 55.7 | 58.1     | 47.4 | 61.3      | 48   | 51.4 | 73.1 | 62.5             | 44.8 | 61.7 | 51.7  | 73.7                  | 46.1 | 62.3 | 40.9  | 57.7     | 51.5 | 60.7 |
| p                                                                                             | 0.139  |      | 0.002  |       |       |      | 0.021      |      |      |       | 0.245                    |      | 0.433    |      | 0.124     |      |      |      | 0.001            |      |      |       | 0.151                 |      |      |       | 0.078    |      |      |
| 12_agree                                                                                      | 7.5    | 16.8 | 6.6    | 5.3   | 15.1  | 16.7 | 8.5        | 12.8 | 0    | 17.2  | 9                        | 12.2 | 9.3      | 18.4 | 6.5       | 12   | 8.1  | 15.4 | 17.5             | 14.9 | 4.7  | 16.4  | 10.5                  | 10.3 | 9    | 15.9  | 11.5     | 15.4 | 6.7  |
| p                                                                                             | 0.01   |      | 0.11   |       |       |      | <0.001     |      |      |       | 0.55                     |      | 0.006    |      | 0.313     |      |      |      | 0.086            |      |      |       | 0.819                 |      |      |       | 0.012    |      |      |
| 13_agree                                                                                      | 89.2   | 78.9 | 86.8   | 86.3  | 84.9  | 85.7 | 97.9       | 81.1 | 96.2 | 72.4  | 84.7                     | 87.8 | 87       | 78.9 | 80.6      | 85.3 | 89.2 | 84.6 | 95               | 87.4 | 85.2 | 89.1  | 81.6                  | 94.9 | 85.9 | 81.8  | 80.8     | 84.6 | 87.1 |
| p                                                                                             | 0.056  |      | 0.866  |       |       |      | <0.001     |      |      |       | 0.66                     |      | 0.007    |      | 0.471     |      |      |      | 0.839            |      |      |       | 0.563                 |      |      |       | 0.739    |      |      |
| 14_agree                                                                                      | 46.9   | 51.6 | 46.1   | 57.9  | 45.3  | 41.7 | 46.8       | 50.8 | 45.3 | 41.4  | 46.9                     | 50.4 | 48.5     | 47.4 | 48.4      | 46.7 | 52.7 | 50   | 42.5             | 43.7 | 45.3 | 54.5  | 60.5                  | 38.5 | 52.3 | 45.5  | 46.2     | 46.9 | 49.4 |
| p                                                                                             | 0.628  |      | 0.129  |       |       |      | 0.894      |      |      |       | 0.305                    |      | 0.297    |      | 0.819     |      |      |      | 0.592            |      |      |       | 0.668                 |      |      |       | 0.792    |      |      |
| 15_agree                                                                                      | 80.8   | 78.9 | 81.6   | 83.2  | 77.4  | 77.4 | 87.2       | 82.1 | 83   | 51.7  | 78.5                     | 82.4 | 81.5     | 71.1 | 77.4      | 78.7 | 83.8 | 65.4 | 92.5             | 78.2 | 81.3 | 81.8  | 78.9                  | 69.2 | 81.4 | 84.1  | 80.8     | 80.8 | 79.8 |
| P                                                                                             | 0.844  |      | 0.066  |       |       |      | 0.005      |      |      |       | 0.665                    |      | 0.045    |      | 0.131     |      |      |      | 0.02             |      |      |       | 0.004                 |      |      |       | 0.138    |      |      |
| 16_agree                                                                                      | 89.7   | 93.7 | 90.8   | 93.7  | 92.5  | 86.9 | 97.9       | 89.4 | 98.1 | 75.9  | 91                       | 90.8 | 92.2     | 81.6 | 87.1      | 90.7 | 91.9 | 90.3 | 97.5             | 90.8 | 91.4 | 89.1  | 92.1                  | 89.7 | 92   | 88.6  | 88.5     | 90   | 91.6 |
| P                                                                                             | 0.319  |      | 0.168  |       |       |      | 0.006      |      |      |       | 0.373                    |      | 0.026    |      | 0.053     |      |      |      | 0.988            |      |      |       | 0.47                  |      |      |       | 0.057    |      |      |
| 17_agree                                                                                      | 85.9   | 89.5 | 94.7   | 87.4  | 92.5  | 76.2 | 93.6       | 84.9 | 90.6 | 82.8  | 85.9                     | 88.5 | 86.3     | 92.1 | 90.3      | 78.7 | 89.2 | 73.1 | 100              | 79.3 | 90.6 | 87.3  | 92.1                  | 74.4 | 90.5 | 84.1  | 84.6     | 83.8 | 89.3 |
| P                                                                                             | 0.64   |      | 0.012  |       |       |      | 0.377      |      |      |       | 0.676                    |      | 0.27     |      | <0.001    |      |      |      | 0.099            |      |      |       | 0.74                  |      |      |       | 0.092    |      |      |
| 18_agree                                                                                      | 94.4   | 92.6 | 97.4   | 96.8  | 94.3  | 86.9 | 97.9       | 92.7 | 100  | 82.8  | 93.8                     | 93.9 | 94.1     | 92.1 | 92.5      | 89.3 | 100  | 84.6 | 100              | 87.4 | 95.3 | 98.2  | 97.4                  | 82.1 | 96   | 93.2  | 96.2     | 91.5 | 95.5 |
| P                                                                                             | 0.124  |      | 0.031  |       |       |      | 0.002      |      |      |       | 0.437                    |      | 0.044    |      | <0.001    |      |      |      | 0.005            |      |      |       | 0.001                 |      |      |       | 0.17     |      |      |
| 19_agree                                                                                      | 93     | 94.7 | 96.1   | 94.7  | 100   | 85.7 | 89.4       | 93.9 | 98.1 | 89.7  | 93.2                     | 93.9 | 93.3     | 94.7 | 93.5      | 90.7 | 05.9 | 88.5 | 97.5             | 89.7 | 93.8 | 96.4  | 97.4                  | 87.2 | 94.5 | 93.2  | 96.2     | 93.1 | 93.8 |
| P                                                                                             | 0.631  |      | 0.04   |       |       |      | 0.299      |      |      |       | 0.955                    |      | 0.576    |      | 0.332     |      |      |      | 0.517            |      |      |       | 0.451                 |      |      |       | 0.698    |      |      |
| 20_agree                                                                                      | 83.1   | 77.9 | 89.5   | 80    | 86.8  | 72.6 | 83         | 82.7 | 81.1 | 72.4  | 81.4                     | 81.7 | 80.7     | 86.8 | 82.8      | 76   | 85.1 | 65.4 | 92.5             | 80.5 | 85.2 | 72.7  | 84.2                  | 82.1 | 83.4 | 79.5  | 69.2     | 80.8 | 82   |
| P                                                                                             | 0.257  |      | 0.042  |       |       |      | 0.027      |      |      |       | 0.783                    |      | 0.153    |      | 0.185     |      |      |      | 0.382            |      |      |       | 0.585                 |      |      |       | 0.902    |      |      |
| 21_yes                                                                                        | 23.5   | 30.5 | 50     | 26.3  | 13.2  | 10.7 | 25.5       | 21.2 | 50.9 | 6.9   | 29.9                     | 19.8 | 25.9     | 23.7 | 25.8      | 28   | 27   | 7.7  | 30               | 11.5 | 37.5 | 12.7  | 36.8                  | 10.3 | 30.2 | 22.7  | 19.2     | 14.6 | 33.7 |
| P                                                                                             | 0.18   |      | <0.001 |       |       |      | <0.001     |      |      |       | 0.027                    |      | 0.161    |      | 0.027     |      |      |      | <0.001           |      |      |       | 0.406                 |      |      |       | <0.001   |      |      |
| 25_yes                                                                                        | 0.9    | 4.2  | 1.3    | 1.1   | 0     | 4.8  | 2.1        | 1.7  | 0    | 6.9   | 1.7                      | 2.3  | 1.5      | 5.3  | 2.2       | 1.3  | 4.1  | 0    | 0                | 3.4  | 7.8  | 1.8   | 0                     | 2.6  | 1    | 4.5   | 3.8      | 2.3  | 1.7  |
| p                                                                                             | 0.142  |      | 0.208  |       |       |      | 0.014      |      |      |       | 0.252                    |      | <0.001   |      | 0.723     |      |      |      | 0.636            |      |      |       | 0.611                 |      |      |       | 0.514    |      |      |
| 26_agree                                                                                      | 86.4   | 83.2 | 97.4   | 89.5  | 79.2  | 73.8 | 89.4       | 83.8 | 94.3 | 72.4  | 85.3                     | 85.5 | 85.9     | 81.6 | 88.2      | 84   | 86.5 | 61.5 | 95               | 71.3 | 91.4 | 87.3  | 94.7                  | 69.2 | 89.4 | 84.1  | 80.8     | 80.8 | 88.8 |
| p                                                                                             | 0.358  |      | <0.001 |       |       |      | 0.383      |      |      |       | 0.64                     |      | 0.773    |      | 0.03      |      |      |      | 0.001            |      |      |       | 0.009                 |      |      |       | 0.146    |      |      |
